# Supplementary material for: Aqueous hybrids of amino-functionalized nanosilica and acrylamide-based polymer for enhanced oil recovery
Source: PubMed Central journal article supplement — RSC Adv. 2018 Nov 13;8(66):38056–64. doi: 10.1039/c8ra07076h (PMC9089851; doi:10.1039/c8ra07076h), 2018-11-13
Supplement: RA-008-C8RA07076H-s001.pdf [file RA-008-C8RA07076H-s001.pdf]

## Supplementary File

### **Aqueous hybrids of amino-functionalized nanosilica and acrylamide-based polymer for enhanced oil recovery**

Jie Cao <sup>a\*</sup>, Tao Song <sup>a</sup>, Yuejun Zhu <sup>b, c</sup>, Xiujun Wang <sup>b, c</sup>, Shanshan Wang <sup>b, c</sup>, Jingcheng Yu <sup>a</sup>, Yin Ba <sup>a</sup>,

Jian Zhang <sup>b, c\*</sup>

<sup>a</sup> *School of Petroleum Engineering, China University of Petroleum (East China), Qingdao 266580, China*

<sup>b</sup> *CNOOC Research Institute, Beijing 100027, China*

<sup>c</sup> *State Key Lab of Offshore Oil Exploitation, Beijing 100027, China*

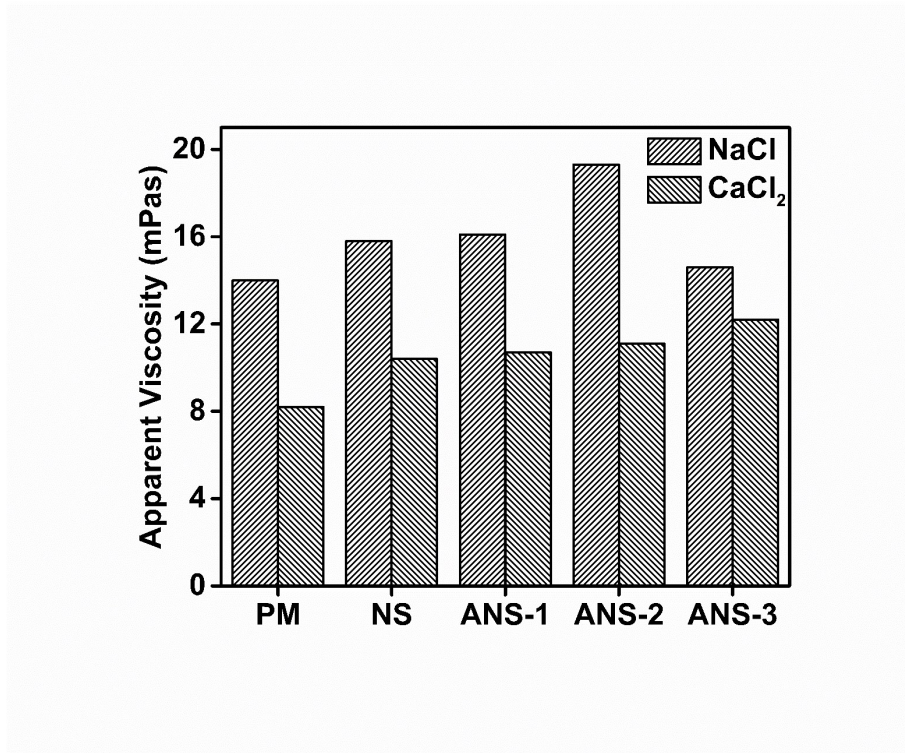

**Fig. S1.** Apparent viscosity plotted as a function of (c) nanoparticle type (25°C, NaCl 9000 mg/L,

CaCl<sub>2</sub> 1200 mg/L)

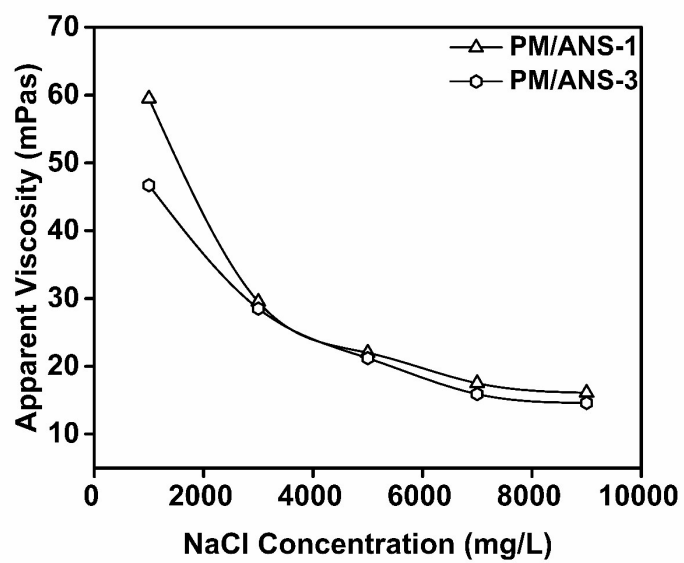

Fig. S2. Apparent viscosity plotted as a function of NaCl concentration at 25°C.

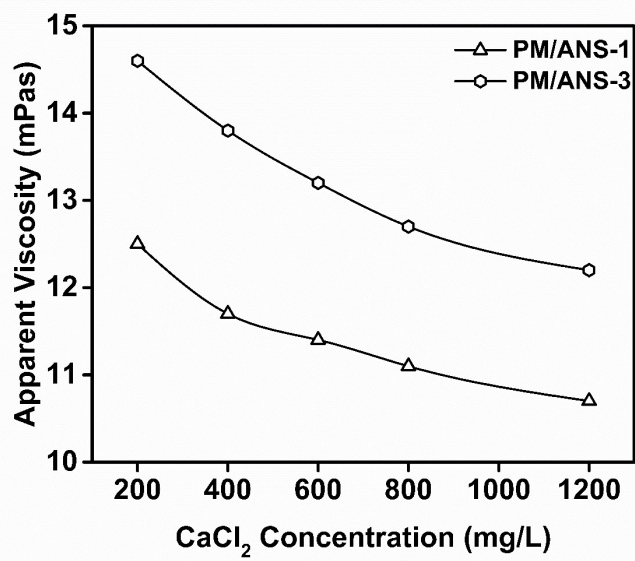

Fig. S3. Apparent viscosity plotted as a function of CaCl<sub>2</sub> concentration at 25°C.

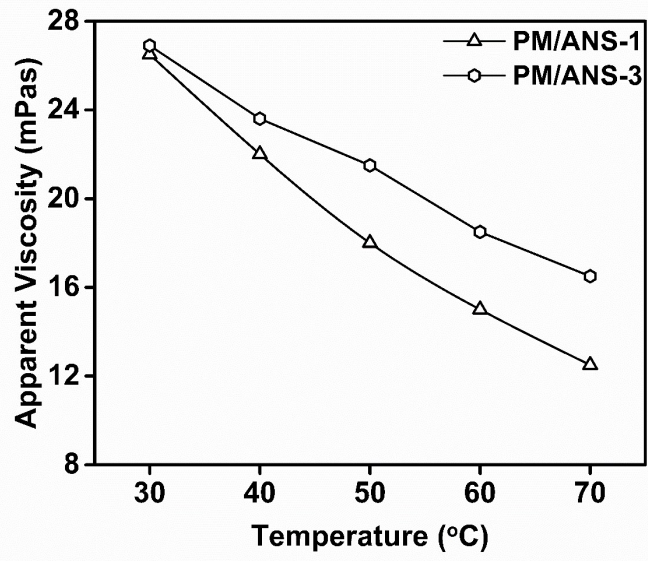

**Fig. S4.** Apparent viscosity plotted as a function of temperature in salt solution (NaCl 3000 mg/L, CaCl<sub>2</sub> 400 mg/L).
